# Supplementary material for: Sensitive detection of RNA based on concatenated self-fuelled strand displacement amplification and hairpin-AgNCs
Source: Royal Society of Chemistry journal article supplement (doi:10.1039/d0ay01762k), 2020-12-09
Supplement: d0ay01762k1.pdf [file d0ay01762k1.pdf]

## *Supplementary Information*

### **Sensitive detection of RNA based on concatenated self-fuelled strand displacement amplification and hairpin-AgNCs**

Yahui Guo,<sup>a</sup> Mofan Wang,<sup>a</sup> Fumiao Shen,<sup>a</sup> Zhigang Hu,<sup>c</sup> Hongliu Ding,<sup>\*b</sup> Weirong Yao<sup>\*a</sup> and He Qian<sup>a</sup>

- a. State Key Laboratory of Food Science and Technology, National Centre for Technology Innovation on Fast Biological Detection of Grain Quality and Safety, School of Food Science and Technology, Jiangnan University, Wuxi, China.*
- b. Suzhou Institute of Supervision and Inspection on Product Quality, Suzhou, China.*
- c. Wuxi Children's Hospital, Wuxi People's Hospital affiliated to Nanjing Medical University, Wuxi, China.*

Corresponding authors: WR.Yao (yaoweirongcn@jiangnan.edu.cn); HL.Ding (hollior@163.com)

**Table S1.** Names and sequences of the oligonucleotides used in this work.

| No. | Name        | Sequence (5'-3')                                                                                   |
|-----|-------------|----------------------------------------------------------------------------------------------------|
| 1   | Temp-1      | CATGTCAACTAATCCCTCAGCAAACGTGACTGATGTTG<br>AGCCTCAGCTCAACATCAGTCTGATAAGCTAAAAAA                     |
| 2   | Temp-2      | GCAACTCAATGAACCCTCAGCAAACCAATGAACTAACC<br>TCAGCCATGTCAACTAATCCC                                    |
| 3   | Prime1      | TGAGGGCTCAACATCAGTCACAGTTTGC                                                                       |
| 4   | Prime2      | TGAGGGATTAGTTGACATG                                                                                |
| 5   | Prime3      | TGAGGGTTCATTGAGTTGC                                                                                |
| 6   | Hairpin DNA | TAATATGCAACGAACGATGCAACGTTTCGATGCCCCCCC<br>GCATCGAACGTTGCATCGTTTCGTTGCATATTA<br>GCAACTCAATGAACAAAA |
| 7   | miRNA-21    | UAGCUUAUCAGACUGAUGUUGA                                                                             |
| 8   | miRNA-27b   | UUCACAGUGGCUAAGUUCUGC                                                                              |
| 9   | miRNA-18a   | UAAGGUGCAUCUAGUGCAGAUAG                                                                            |
| 10  | miRNA-200c  | UAAUACUGCCGGGUAAUGAUGGA                                                                            |
| 11  | miRNA-125b  | UCCCUGAGACCCUAACUUGUGA                                                                             |
| 12  | miRNA-221   | AGCUACAUUGUCUGCGGGUUUC                                                                             |
| 13  | miRNA-451   | AAACCGUUACCAUACUGAGUU                                                                              |

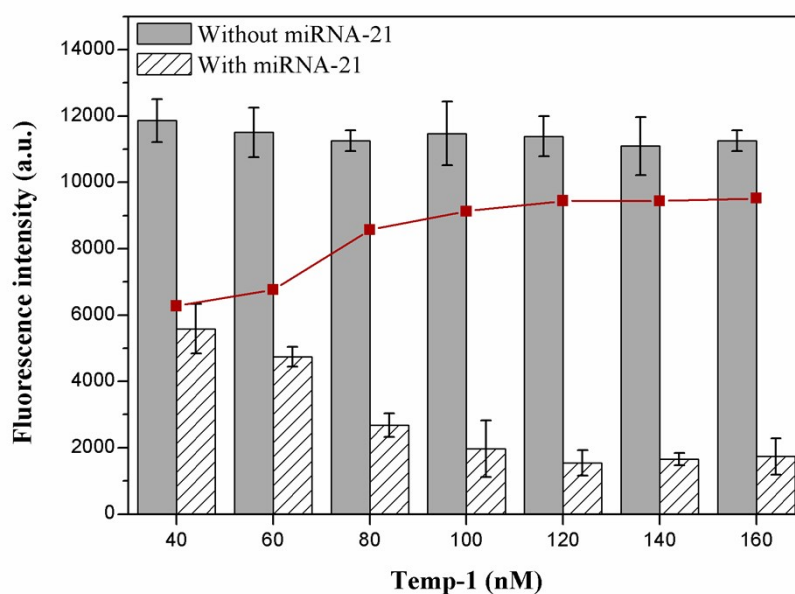

**Figure S1.** Fluorescence intensities of this SFAF-based sensing system with (F) and without (F0) 1.0 nM miRNA-21 in the presence of different concentrations Temp-1. The red line showed the intensity changes (F0-F).

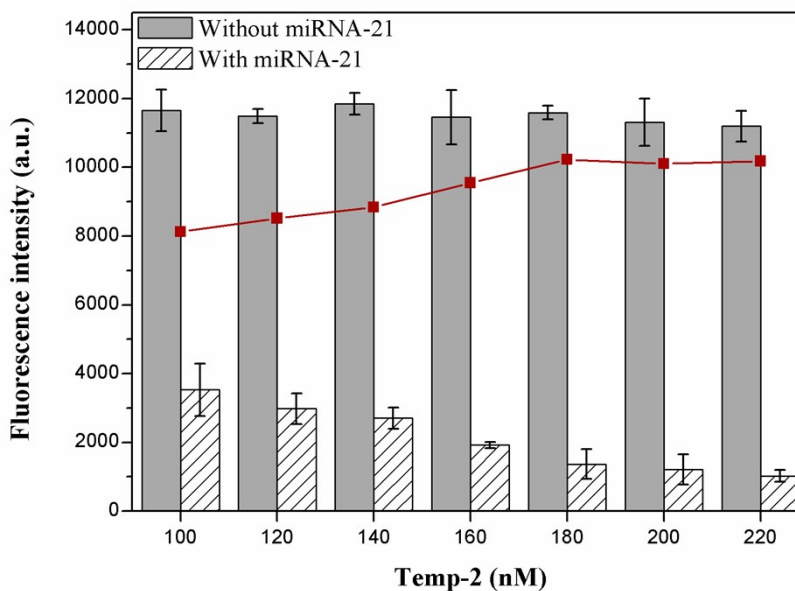

**Figure S2.** Fluorescence intensities of this SFAF-based sensing system with (F) and without (F0) 1.0 nM miRNA-21 in the presence of different concentrations Temp-2. The red line showed the intensity changes (F0-F).

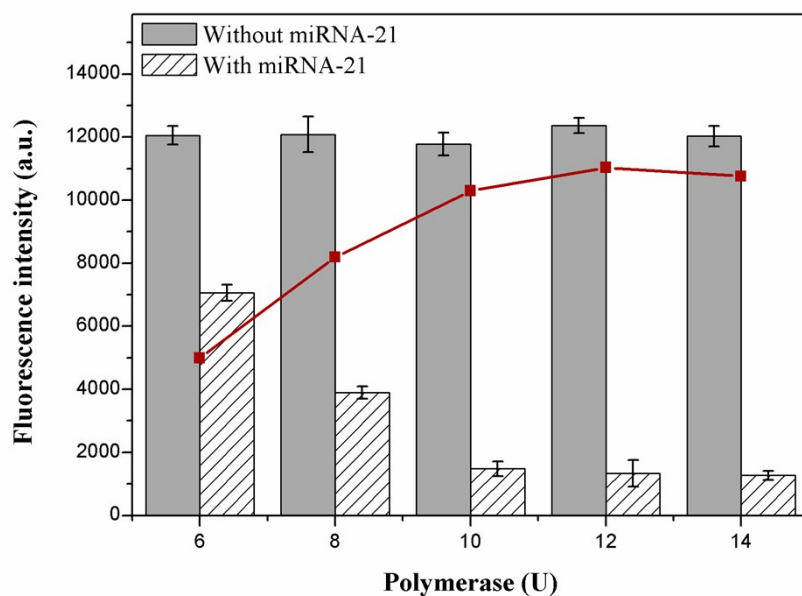

**Figure S3.** Fluorescence intensities of this SFAF-based sensing system with (F) and without (F0) 1.0 nM miRNA-21 in the presence of different units of Klenow Fragment. The red line showed the intensity changes (F0-F).

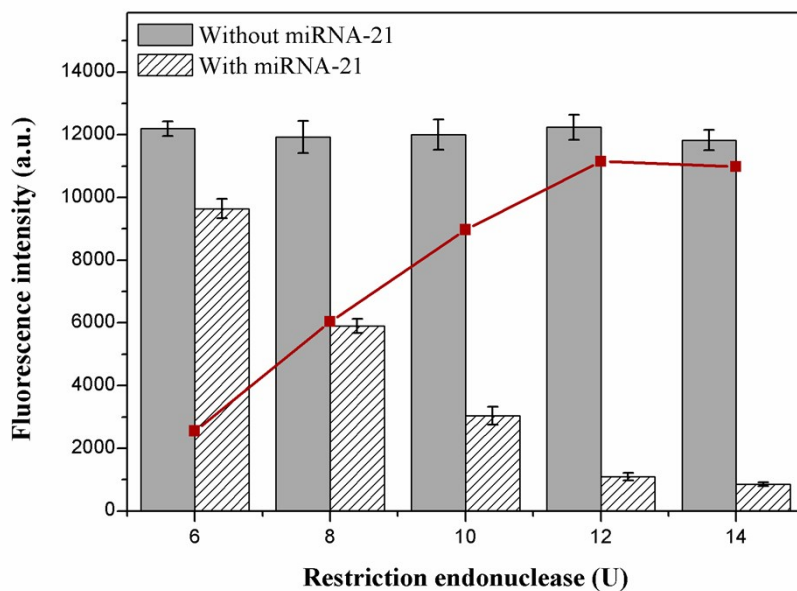

**Figure S4.** Fluorescence intensities of this SFAF-based sensing system with (F) and without (F0) 1.0 nM miRNA-21 in the presence of different units of Nb.Bpu10I. The red line showed the intensity changes (F0-F).

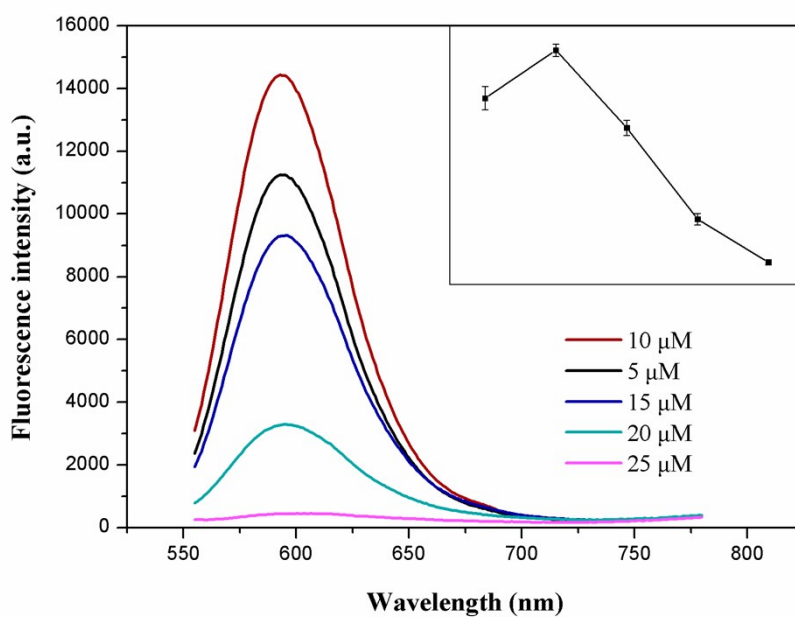

**Figure S5.** The fluorescence spectra of the Hairpin-AgNCs synthesized using different concentrations of  $[AgNO_3]$ . Inset: the change of fluorescence intensity with the increase of concentration of  $[AgNO_3]$ .

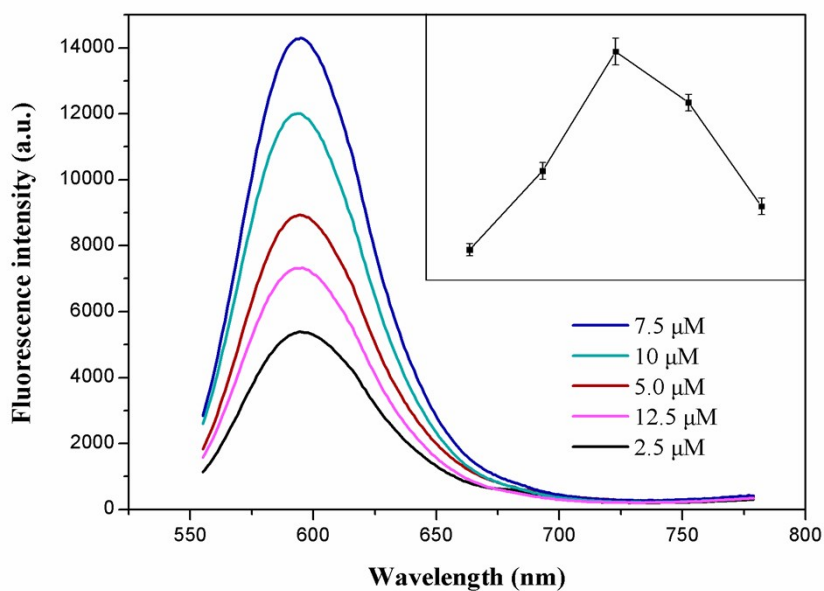

**Figure S6.** The fluorescence spectra of the Hairpin-AgNCs synthesized using different concentrations of  $[NaBH_4]$ . Inset: the change of fluorescence intensity with the increase of concentration of  $[NaBH_4]$ .

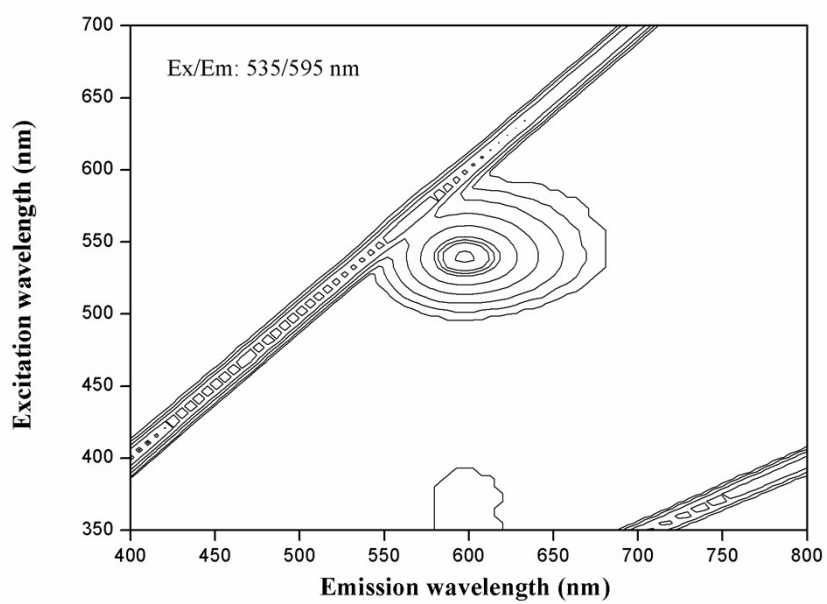

**Figure S7.** The three-dimensional fluorescence spectrum of the Hairpin-AgNCs.

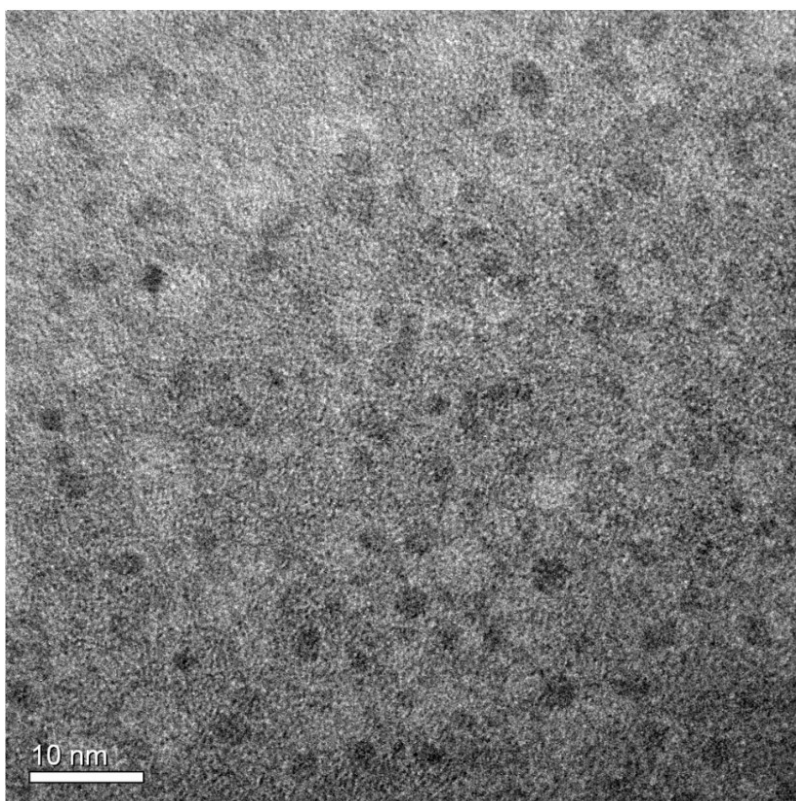

**Figure S8.** The TEM image of the Hairpin-AgNCs.

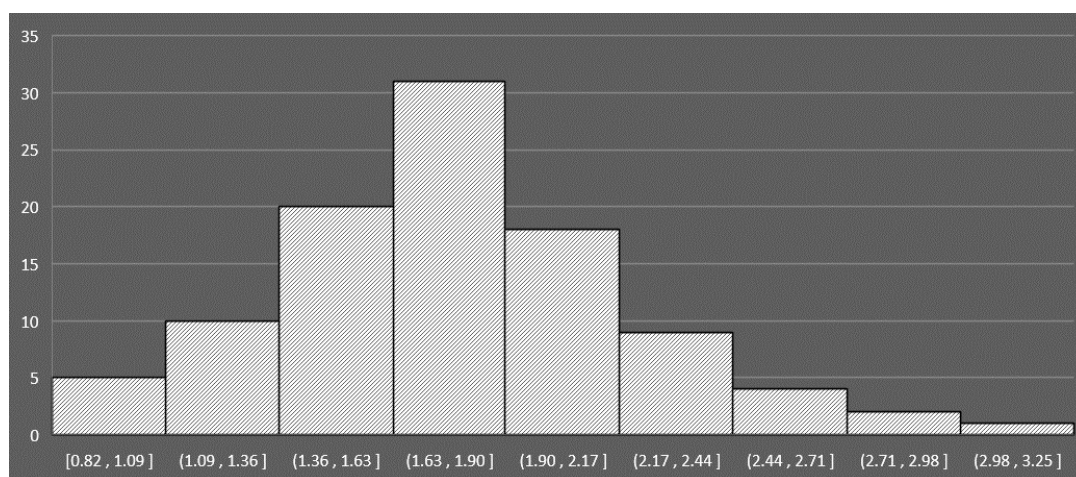

**Figure S9.** The size distribution analysis of the Hairpin-AgNCs in the TEM image by using the ImageJ software. The calculated average diameter was 1.78 nm.
